# Supplementary material for: Shiga Toxin (Stx)-Binding Glycosphingolipids of Primary Human Renal Cortical Epithelial Cells (pHRCEpiCs) and Stx-Mediated Cytotoxicity
Source: PubMed Central journal article supplement (PMC7918848; doi:10.3390/toxins13020139), 2021-02-12
Supplement: toxins-13-00139-s001.pdf [file toxins-13-00139-s001.pdf]

## Supplementary Materials: Shiga Toxin (Stx)-Binding Glycosphingolipids of Primary Human Renal Cortical Epithelial Cells (pHRCEpiCs) and Stx-Mediated Cytotoxicity

Johanna Detzner, Elisabeth Krojnewski, Gottfried Pohlentz, Daniel Steil, Hans-Ulrich Humpf, Alexander Mellmann, Helge Karch and Johannes Müthing

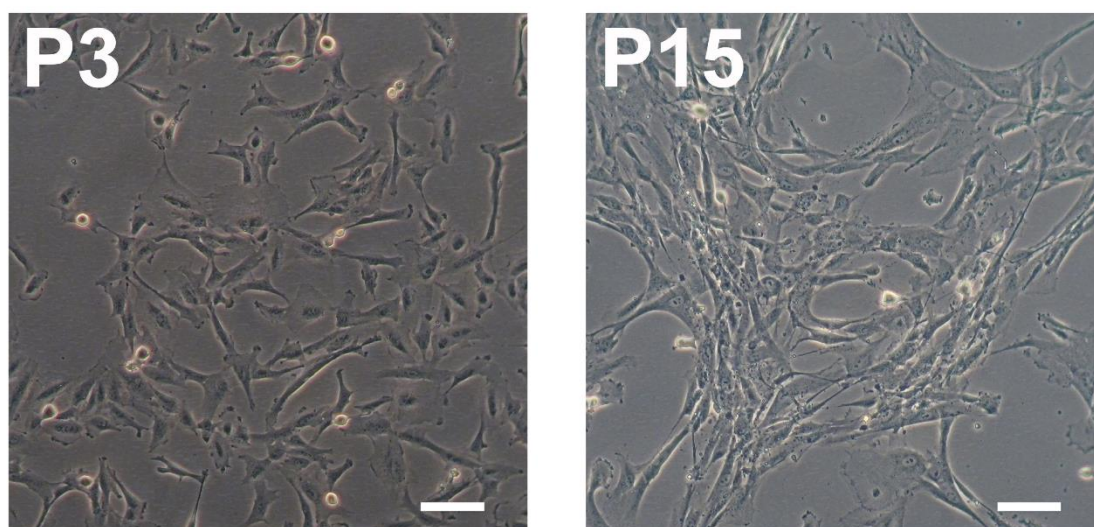

**Figure S1.** Light microscopy micrographs of pHRCEpiCs during passage 3 (P3) and passage 15 (P15) at approximate 50% confluence. Original magnification  $\times 10$ . Bar: 100  $\mu\text{m}$ .

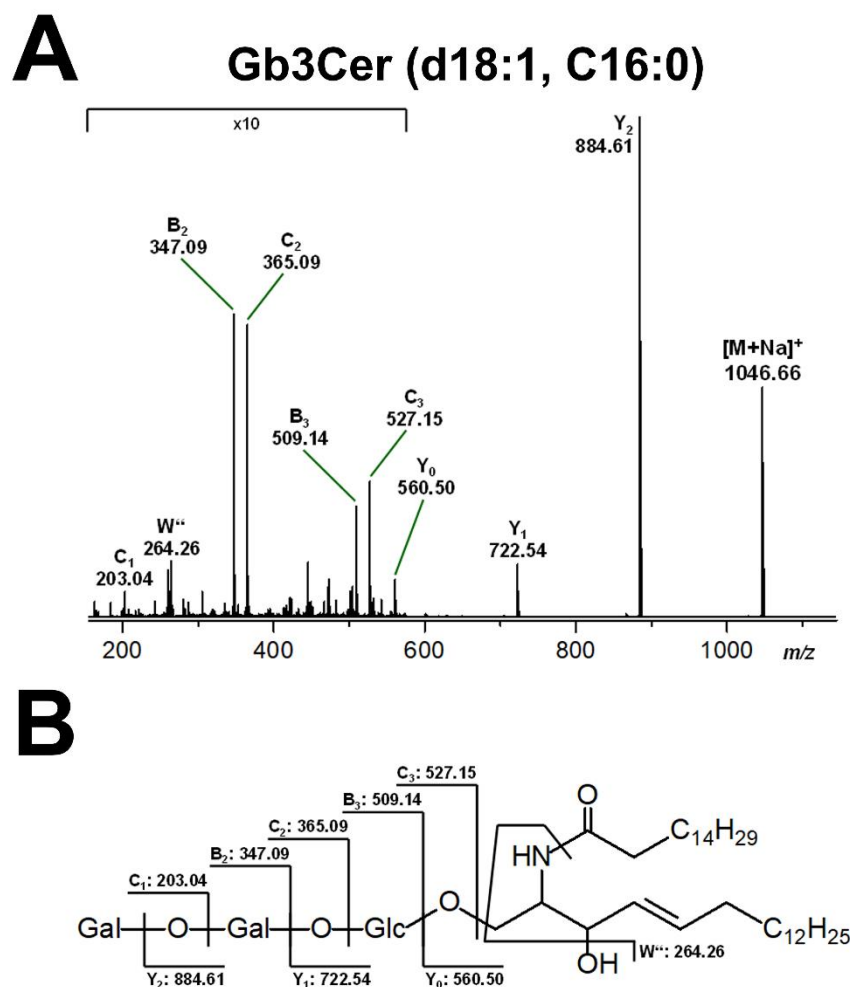

**Figure S2.** MS2 spectrum of Gb3Cer (d18:1, C16:0) (A) and corresponding fragmentation scheme (B) obtained from the neutral GSL preparation of pHRCEpiCs. The MS2 spectrum was achieved by CID experiments of the  $[M+Na]^+$  precursor ions at  $m/z$  1046.66 (see Figure 2) and illustrates, along with the explanatory fragmentation scheme, the structural proof of the MS1-based postulated Gb3Cer lipoform.

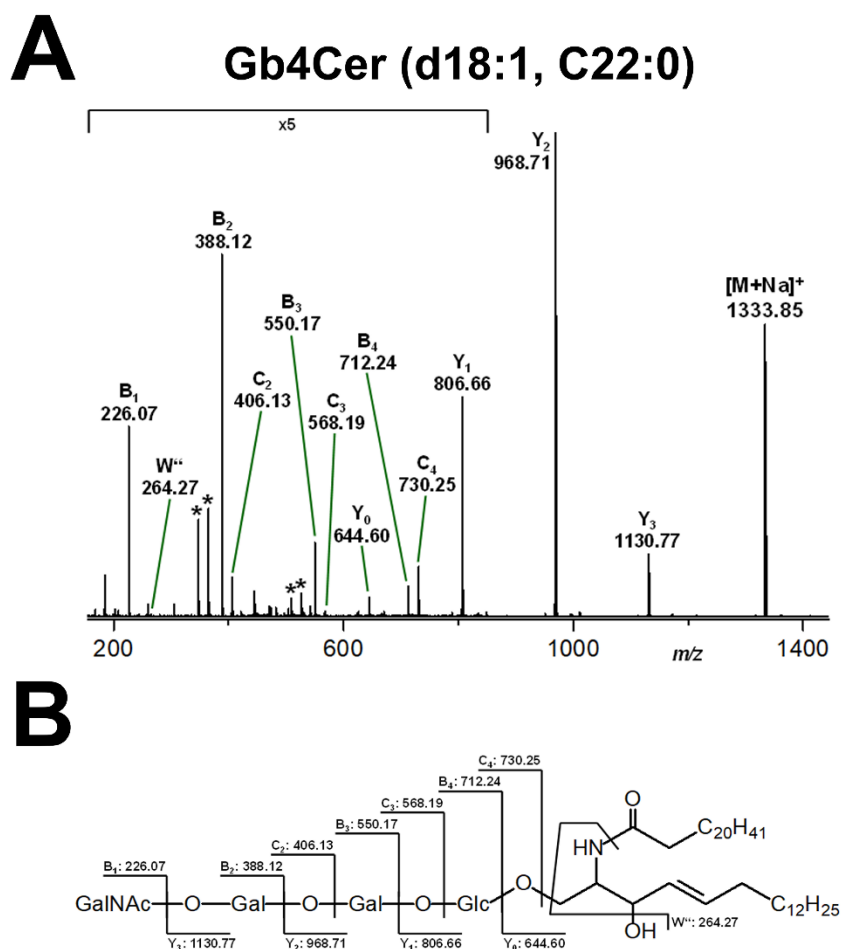

**Figure S3.** MS2 spectrum of Gb4Cer (d18:1, C22:0) (A) and corresponding fragmentation scheme (B) obtained from the neutral GSL preparation of pHRCEpiCs. The MS2 spectrum was achieved by CID experiments of the  $[M+Na]^+$  precursor ions at  $m/z$  1333.85 (see Figure 2) and illustrates, along with the explanatory fragmentation scheme, the structural proof of the MS1-based postulated Gb4Cer lipofom.

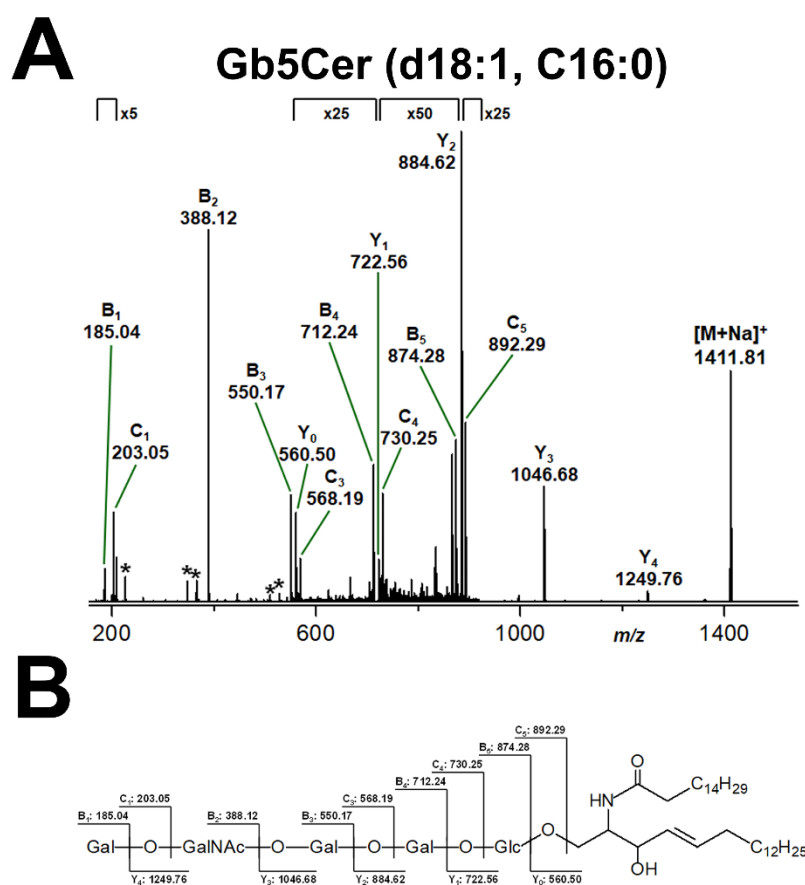

**Figure S4.** MS2 spectrum of Gb5Cer (d18:1, C16:0) (**A**) and corresponding fragmentation scheme (**B**) obtained from the neutral GSL preparation of pHRCEpiCs. The MS2 spectrum was achieved by CID experiments of the  $[M+Na]^+$  precursor ions at  $m/z$  1411.81 (see Figure 2) and illustrates, along with the explanatory fragmentation scheme, the structural proof of the MS1-based postulated Gb5Cer lipoform.

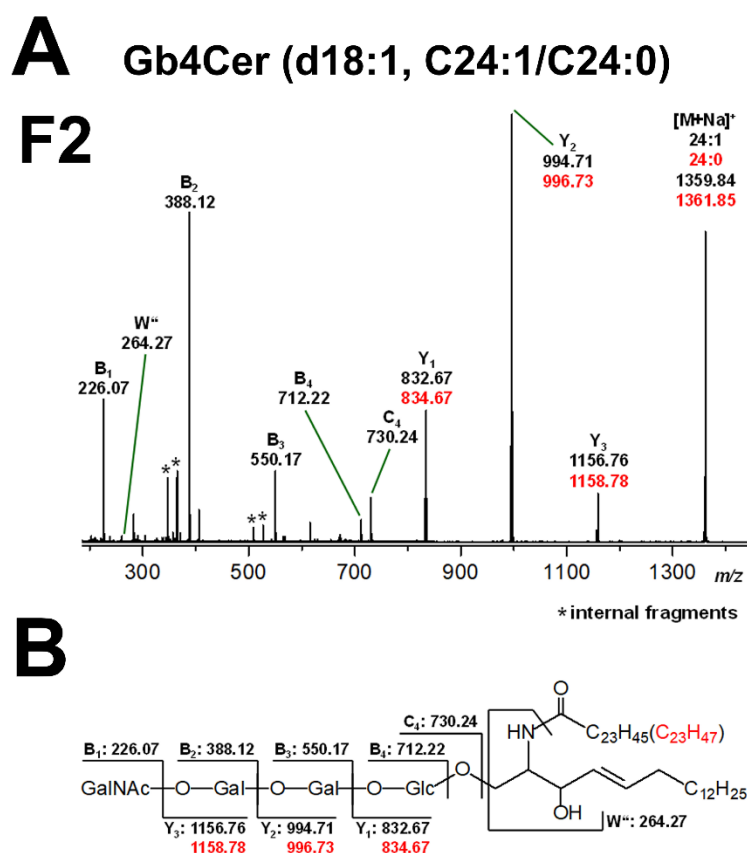

**Figure S5.** MS2 spectrum of Gb4Cer (d18:1, C24:1/C24:0) (A) and corresponding fragmentation scheme (B) obtained from the F2 gradient fraction of pHRCEpiCs. The MS2 spectrum was achieved by CID experiments of the  $[M+Na]^+$  precursor ions at  $m/z$  1359.84/1361.85 (see Figure 4) and illustrates, along with the explanatory fragmentation scheme, the structural proof of the MS1-based postulated Gb4Cer lipofoms.

# A Gb4Cer (d18:1, C24:2/C24:1/C24:0)

## F7

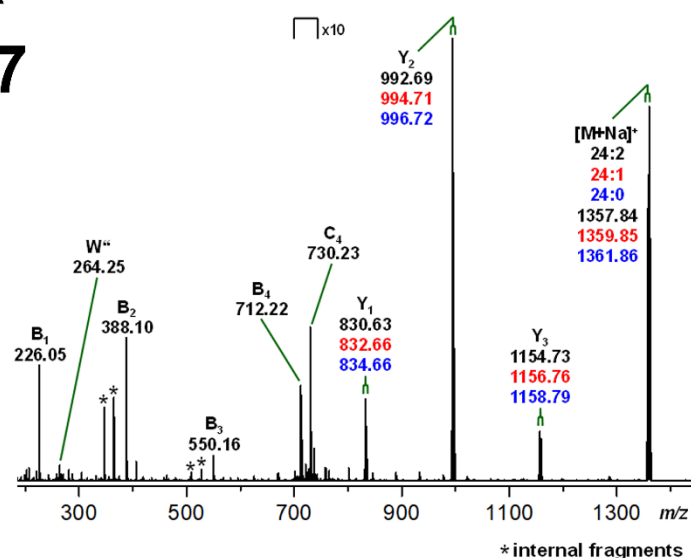

## B

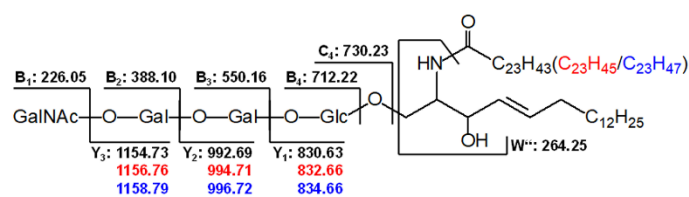

**Figure S6.** MS2 spectrum of Gb4Cer (d18:1, C24:2/C24:1/C24:0) (A) and corresponding fragmentation scheme (B) obtained from the F7 gradient fraction of pHRCEpiCs. The MS2 spectrum was achieved by CID experiments of the  $[M+Na]^+$  precursor ions at  $m/z$  1357.84/1359.85/1361.86 (see Figure 4) and illustrates, along with the explanatory fragmentation scheme, the structural proof of the MS1-based postulated Gb4Cer lipofoms.
